# Supplementary material for: Histone deacetylases 1 and 2 restrain CD4+ cytotoxic T lymphocyte differentiation
Source: PubMed Central journal article supplement (PMC7101144; doi:10.1172/jci.insight.133393), 2020-02-27
Supplement: jciinsight-5-133393-s081.pdf [file jciinsight-5-133393-s081.pdf]

## Supplementary Information

**Histone deacetylase 1 and 2 restrain CD4<sup>+</sup> cytotoxic T lymphocyte differentiation**

**Authors:** Teresa Preglej<sup>1</sup>, Patricia Hamminger<sup>1</sup>, Maik Luu<sup>2</sup>, Tanja Bulat<sup>3</sup>, Liisa Andersen<sup>1</sup>, Lisa Göschl<sup>1,4</sup>, Valentina Stolz<sup>1</sup>, Ramona Rica<sup>1</sup>, Lisa Sandner<sup>1</sup>, Darina Waltenberger<sup>1</sup>, Roland Tschismarov<sup>5</sup>, Thomas Faux<sup>6</sup>, Thorina Boenke<sup>7</sup>, Asta Laiho<sup>6</sup>, Laura L. Elo<sup>6</sup>, Shinya Sakaguchi<sup>1</sup>, Günter Steiner<sup>4,8</sup>, Thomas Decker<sup>5</sup>, Barbara Bohle<sup>9</sup>, Alexander Visekruna<sup>2</sup>, Christoph Bock<sup>7,10</sup>, Birgit Strobl<sup>4</sup>, Christian Seiser<sup>11</sup>, Nicole Boucheron<sup>1</sup> and Wilfried Ellmeier<sup>1</sup>

<sup>1</sup>Division of Immunobiology, Institute of Immunology, Center for Pathophysiology, Infectiology and Immunology, Medical University of Vienna, Austria.

<sup>2</sup>Institute for Medical Microbiology and Hygiene, Philipps-University Marburg, Marburg, Germany.

<sup>3</sup>Institute of Animal Breeding and Genetics, Department of Biomedical Science, University of Veterinary Medicine Vienna, 1210 Vienna, Austria.

<sup>4</sup>Division of Rheumatology, Department of Internal Medicine III, Medical University of Vienna, 1090 Vienna, Austria.

<sup>5</sup>Max Perutz Labs, University of Vienna, Dr. Bohr-Gasse 9, 1030 Vienna

<sup>6</sup>Medical Bioinformatics Centre, Turku Bioscience Centre, University of Turku and Åbo Akademi University, Turku, Finland

<sup>7</sup>CeMM Research Center for Molecular Medicine of the Austrian Academy of Sciences, Vienna, Austria.

<sup>8</sup>Ludwig Boltzmann Institute for Arthritis and Rehabilitation, Vienna, Austria

<sup>9</sup>Department of Pathophysiology and Allergy Research, Center for Pathophysiology, Infectiology and Immunology, Medical University of Vienna, Vienna, Austria.

<sup>10</sup>Department of Laboratory Medicine, Medical University of Vienna, Vienna, Austria

<sup>11</sup>Division of Cell and Developmental Biology, Center for Anatomy and Cell Biology, Medical University of Vienna, Vienna, Austria.

Correspondence should be addressed to:

Wilfried Ellmeier, Division of Immunobiology, Institute of Immunology, Center for Pathophysiology, Infectiology and Immunology, Medical University of Vienna, Lazarettgasse 19, 1090 Vienna, Austria.

Phone: +4314016033293; e.mail: [wilfried.ellmeier@meduniwien.ac.at](mailto:wilfried.ellmeier@meduniwien.ac.at)

## Supplementary Figures

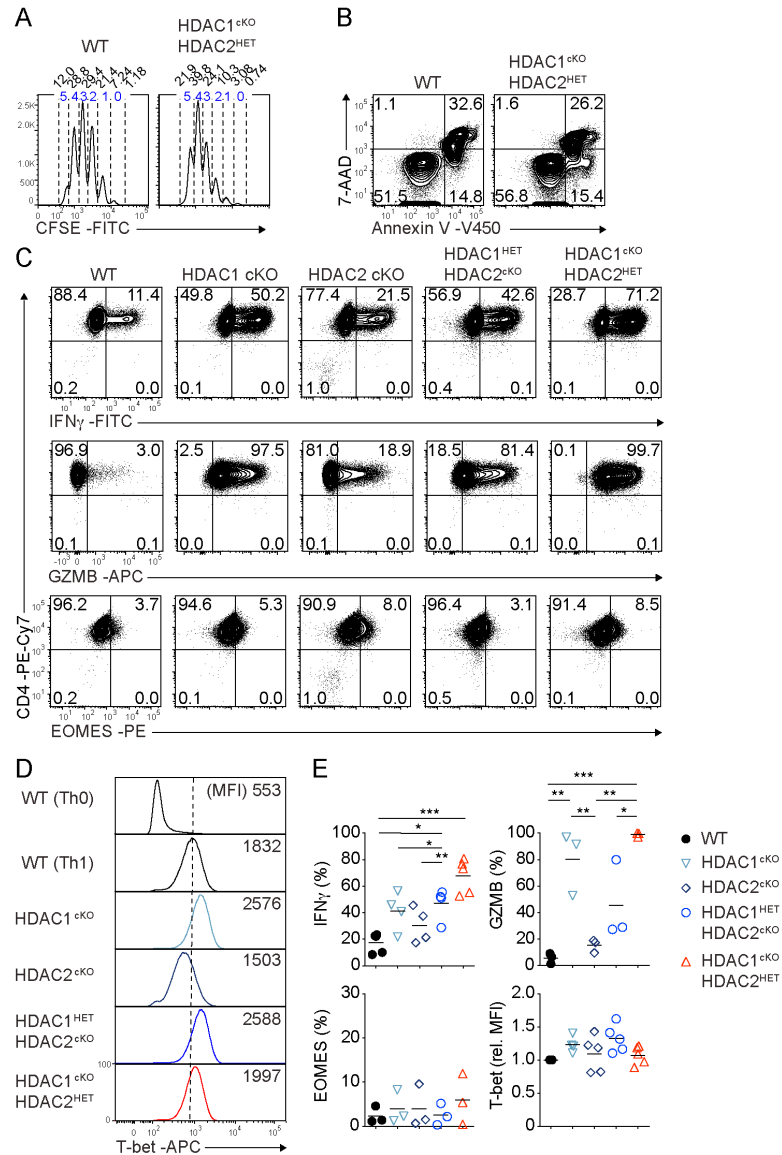

**Figure S1. HDAC1/HDAC2 dosage-dependent upregulation of cytotoxic features in CD4<sup>+</sup> T cells.** (A) Flow cytometry analysis depicting cell divisions of proliferation-dye-labeled WT and HDAC1<sup>cKO</sup> - HDAC2<sup>HET</sup> naïve CD4<sup>+</sup> T cells activated with anti-CD3/anti-CD28 for 3 days in the presence of IL-2. Numbers in gates indicate cell division cycle, whereas upper numbers indicate the percentage of cells in the respective cell division cycle gate. (B) 7AAD/AnnexinV staining of WT and HDAC1<sup>cKO</sup>-HDAC2<sup>HET</sup> CD4<sup>+</sup> T cells activated as described in A. (C) Flow cytometry analysis showing CD4, IFN $\gamma$ , granzyme B (GZMB) and EOMES expression in WT, HDAC1<sup>cKO</sup>, HDAC2<sup>cKO</sup>, HDAC1<sup>HET</sup>-HDAC2<sup>cKO</sup> and HDAC1<sup>cKO</sup>-HDAC2<sup>HET</sup> naïve CD4<sup>+</sup> T cells activated with anti-CD3/anti-CD28 for 3 days in the presence of IL-2 under Th1 polarizing conditions (IL-12 and anti-IL-4). (D) Histograms depict T-bet expression in WT, HDAC1<sup>cKO</sup>, HDAC2<sup>cKO</sup>, HDAC1<sup>HET</sup> -HDAC2<sup>cKO</sup> and HDAC1<sup>cKO</sup>-HDAC2<sup>HET</sup> naïve CD4<sup>+</sup> T cells activated as described in C. (E) Summary diagrams showing the percentages (%) of cells of the indicated genotype expressing IFN $\gamma$ , T-bet and EOMES as described in C. Each symbol indicates one mouse. Horizontal bars indicate the mean. \*P<0.05, \*\*P<0.01, \*\*\*P<0.001 (One-way ANOVA analysis followed by Tukey's multiple-comparison test). (A,B,C) Numbers indicate the mean fluorescence intensity (MFI) (A) or the percentage of cells in the respective quadrants or gates (B,C). (D) The dotted vertical lines indicate the peak of the WT histogram (for MFI). Data are representative (A,B,C,D) or show summary (E) of at least 2 (A,B), 5 (C,D,E) mice that were analyzed in at least 3 (A), 2 (B,C) and 4 (D,E) independent experiments.

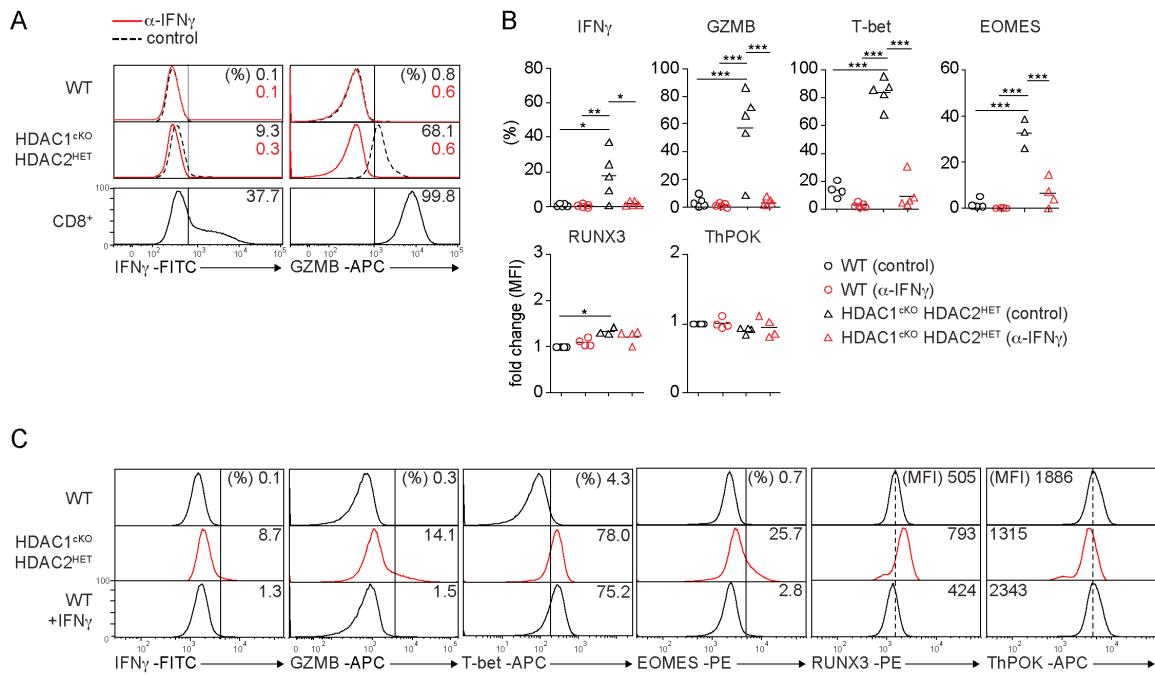

**Figure S2. IFN $\gamma$  signaling is necessary for the upregulation of cytotoxic features in HDAC1<sup>cKO</sup>-HDAC2<sup>HET</sup> mice.** (A) Histograms depict IFN $\gamma$  and granzyme B (GZMB) expression in naïve WT, HDAC1<sup>cKO</sup>-HDAC2<sup>HET</sup> CD4<sup>+</sup> and WT CD8<sup>+</sup> T cells activated with anti-CD3/anti-CD28 for 3 days in the presence or absence (control) of IFN $\gamma$  blocking antibodies ( $\alpha$ -IFN $\gamma$ ) and analyzed by flow cytometry. (B) Summary of experiments described in A. Diagrams depict either the percentages (%) of CD4<sup>+</sup> T cells expressing the indicated cytokines/transcription factors; or WT (control) MFI levels were set as 1 and relative MFI levels in WT ( $\alpha$ -IFN $\gamma$ ) and HDAC1<sup>cKO</sup>-HDAC2<sup>HET</sup> (control/ $\alpha$ -IFN $\gamma$ ) CD4<sup>+</sup> T cells are shown. Each symbol indicates one independent biological sample. Horizontal bars indicate the mean. \*P<0.05, \*\*P<0.01, \*\*\*P<0.001 (One-way ANOVA analysis followed by Tukey's multiple-comparison test). (C) Histograms showing IFN $\gamma$ , granzyme B (GZMB), T-bet, EOMES, RUNX3 and ThPOK expression in naïve WT, HDAC1<sup>cKO</sup>-HDAC2<sup>HET</sup> CD4<sup>+</sup> and WT CD8<sup>+</sup> T cells activated with anti-CD3/anti-CD28 for 3 days in the presence or absence of exogenous IFN $\gamma$  and analyzed by flow cytometry. (A,C) Numbers indicate the percentage of cells in the respective quadrants or gates or as indicated mean fluorescence intensity (MFI). (A,C) The dotted vertical lines indicate the peak of the WT histogram (for MFI), while the vertical solid lines indicates the gating region for the percentage of cells. Data are representative of at least 5 (A-C) mice that were analyzed in at least 3 (A,B) and 2 (C) independent experiments.

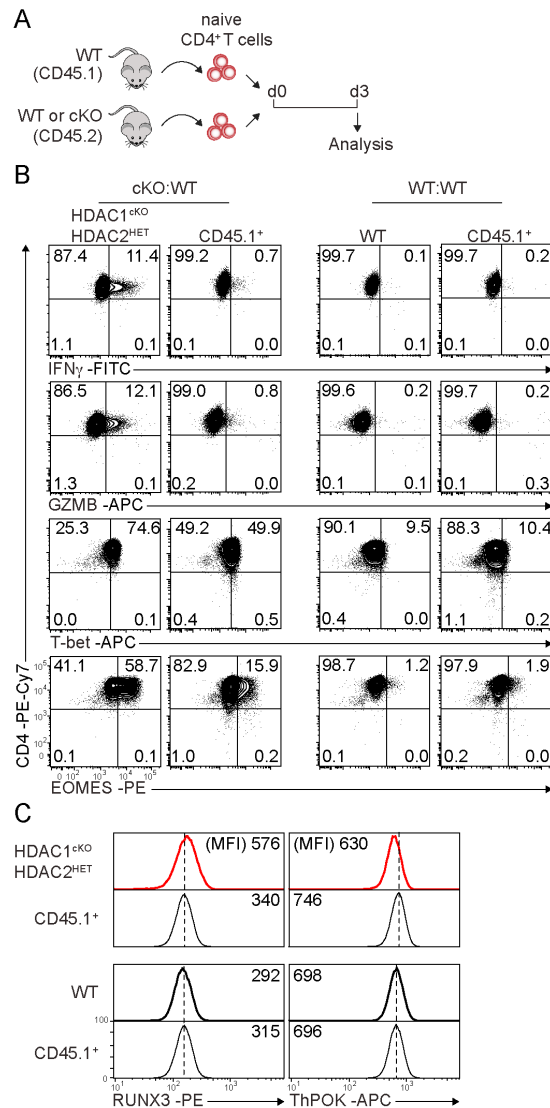

**Figure S3. Upregulation of CD4<sup>+</sup> CTL features in HDAC1<sup>cKO</sup>-HDAC2<sup>HET</sup> CD4<sup>+</sup> T cells is induced by cell-intrinsic features.** (A) Experimental outline for co-culture experiments: sorted naïve CD4<sup>+</sup> T cells from either WT or HDAC1<sup>cKO</sup>-HDAC2<sup>HET</sup> mice (CD45.2<sup>+</sup>) and from congenic (CD45.1<sup>+</sup>) mice were mixed at a 1:1 ratio and activated with anti-CD3/anti-CD28 for 3 days. (B) Flow cytometry analysis showing IFN $\gamma$ , granzyme B (GZMB), T-bet and EOMES expression in co-cultured HDAC1<sup>cKO</sup>-HDAC2<sup>HET</sup> and CD45.1<sup>+</sup> CD4<sup>+</sup> T cells, as well as WT and CD45.1<sup>+</sup> CD4<sup>+</sup> T cells. (C) Histograms depict RUNX3 and ThPOK expression in co-cultured HDAC1<sup>cKO</sup>-HDAC2<sup>HET</sup>/WT and CD45.1<sup>+</sup> CD4<sup>+</sup> T cells. (B,C) Numbers indicate the percentage of cells in the respective quadrants and gates or, as indicated mean fluorescence intensity (MFI). (C) The dotted vertical lines indicate the peak of the WT histogram (for MFI). Data are representative of at least 5 (B,C) mice that were analyzed in at least 3 (B,C) independent experiments.

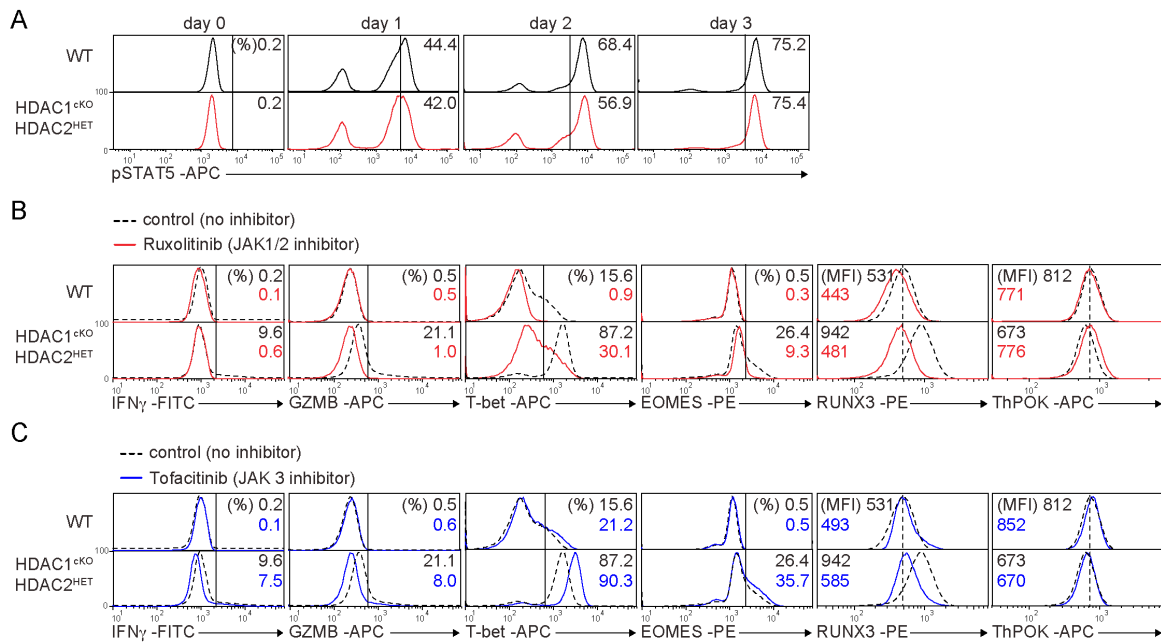

**Figure S4. JAK1/JAK2 signaling is required for the upregulation of CD4<sup>+</sup> CTL features in HDAC1<sup>ckO</sup>-HDAC2<sup>HET</sup> CD4<sup>+</sup> T cells.** (A) Histograms depict pSTAT5 levels in naïve WT and HDAC1<sup>ckO</sup>-HDAC2<sup>HET</sup> CD4<sup>+</sup> T cells activated with anti-CD3/anti-CD28 in the presence of IL-2 and analyzed by flow cytometry at the indicated time points. (B,C) Histograms showing IFN $\gamma$ , granzyme B (GZMB), T-bet, EOMES, RUNX3 and ThPOK expression in naïve WT and HDAC1<sup>ckO</sup>-HDAC2<sup>HET</sup> CD4<sup>+</sup> T cells activated with anti-CD3/anti-CD28 for 3 days in the presence or absence of the JAK1/2 inhibitor Ruxolitinib (B) or the JAK3 inhibitor Tofacitinib (C). (B,C) Dotted lines represent control cells (no inhibitor treatment). The same non-treated WT and HDAC1<sup>ckO</sup>-HDAC2<sup>HET</sup> samples are shown in B and C. (A-C) Numbers indicate the percentage of cells in the respective regions or the mean fluorescence intensity (MFI). (A-C) The dotted vertical lines indicate the peak of the WT histogram (for MFI), while the vertical solid lines indicate the gating region for the percentage of cells. Data are representative of at least 4 (A-C) mice that were analyzed in at least 2 (A) and 4 (B,C) independent experiments.

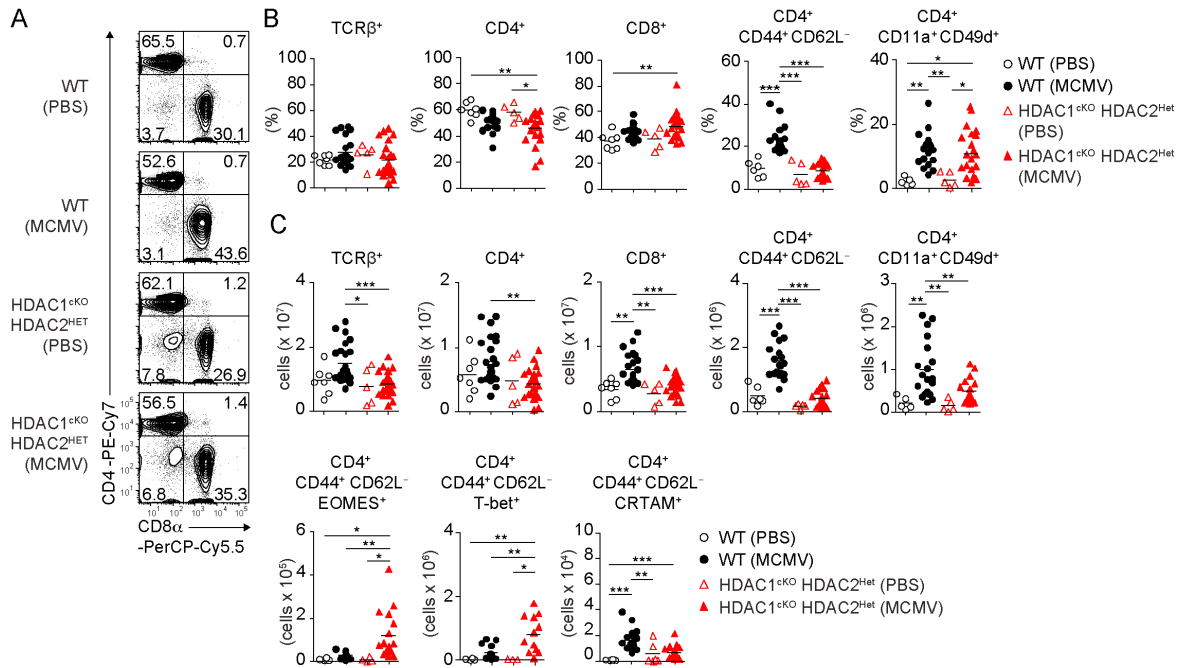

**Figure S5. CD4<sup>+</sup> CTL features are induced in HDAC1<sup>cKO</sup>-HDAC2<sup>HET</sup> CD4<sup>+</sup> T cells upon MCMV infection.** (A) Flow cytometry analysis of splenocytes isolated from WT and HDAC1<sup>cKO</sup>-HDAC2<sup>HET</sup> mice upon MCMV infection or control PBS injection showing CD4 and CD8 expression on viable TCRβ<sup>+</sup> splenocytes. Numbers indicate the percentage of cells in the respective quadrants. (B,C) Diagrams show the percentage (B) and the total cell number (C) of TCRβ<sup>+</sup>, CD4<sup>+</sup>, CD8<sup>+</sup>, CD4<sup>+</sup> CD44<sup>+</sup>CD62L<sup>-</sup>, CD4<sup>+</sup> CD11a<sup>+</sup>CD49d<sup>+</sup> viable splenocytes as well as of EOMES<sup>+</sup>, T-bet<sup>+</sup> and CRTAM<sup>+</sup> CD4<sup>+</sup>CD44<sup>+</sup>CD62L<sup>-</sup> viable splenocytes, respectively, isolated from WT and HDAC1<sup>cKO</sup>-HDAC2<sup>HET</sup> (MCMV and PBS-control) mice. Each symbol indicates one mouse. Horizontal bars indicate the mean. \*P<0.05, \*\*P<0.01, \*\*\*P<0.001 (One-way ANOVA analysis followed by Tukey's multiple-comparison test). Data are representative (A) or show a summary (B,C) of at least 16 infected (A-C) and 4-6 PBS injected (A-C) mice that were analyzed in at least 4 (A-C) independent experiments.

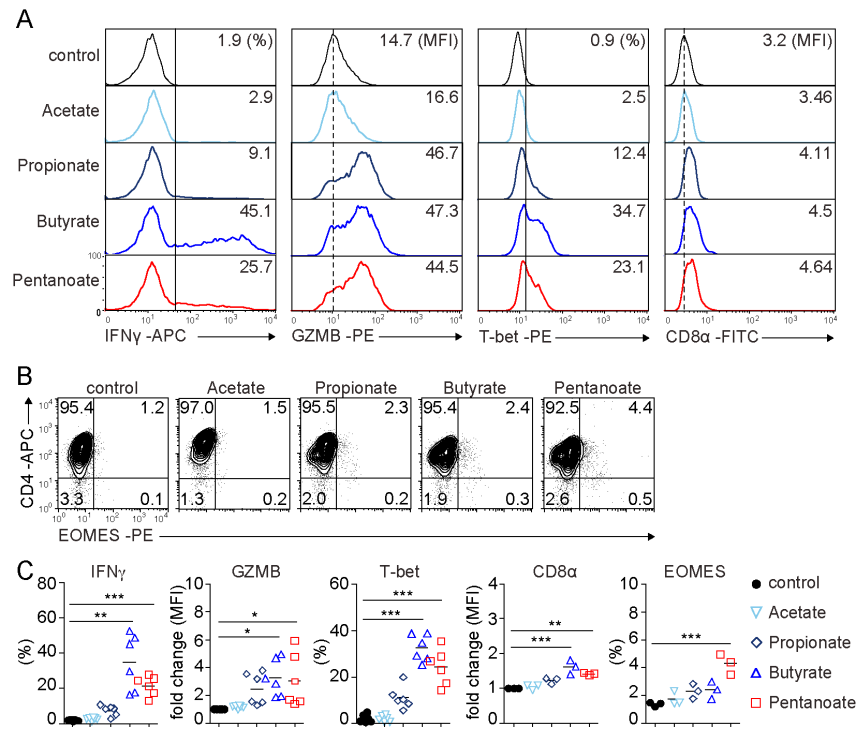

**Figure S6. Murine CD4<sup>+</sup> T cells upregulate cytotoxic features upon SCFA treatment.** (A) Histogram panels depict IFN $\gamma$ , granzyme B (GZMB), T-bet and CD8 $\alpha$  expression on anti-CD3/anti-CD28 activated murine CD4<sup>+</sup> T cells in the absence (control) or presence of acetate, propionate, butyrate and pentanoate, respectively, analyzed by flow cytometry (B) Flow cytometry analysis showing EOMES expression on murine CD4<sup>+</sup> T cells treated as described in (A). (C) Summary of experiments described in A. Diagrams depict either the percentages (%) of CD4<sup>+</sup> T cells expressing the indicated cytokines/transcription factors; or control MFI levels were set as 1 and relative MFI levels in acetate-, propionate-, butyrate- or pentanoate-treated CD4<sup>+</sup> T cells are shown. Each symbol indicates one independent biological sample. Horizontal bars indicate the mean. \*P<0.05, \*\*P<0.01, \*\*\*P<0.001 (One-way ANOVA analysis followed by Tukey's multiple-comparison test). Data are representative (A,B) or show a summary (C) of 6 (A-C) mice that were analyzed in 2 (A-C) independent experiments.

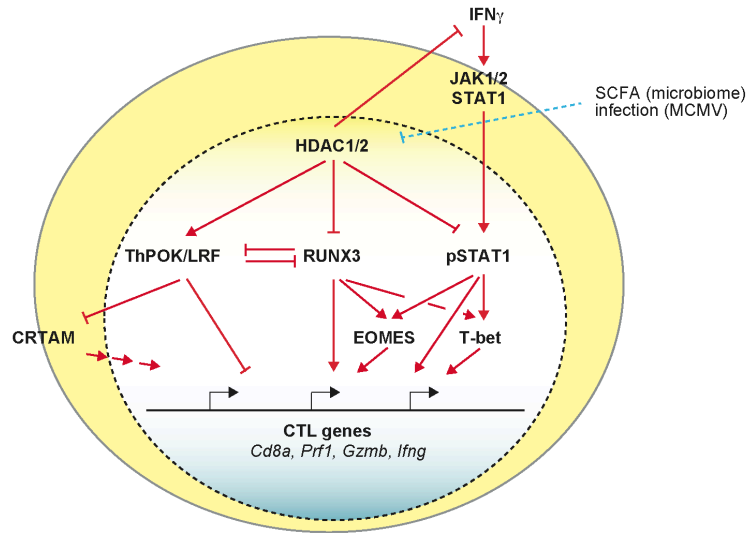

**Figure S7. Model of how HDAC1/2 control CD4<sup>+</sup> CTL induction**

Model depicting the role of HDAC1 and HDAC2 in restraining CD4<sup>+</sup> CTL differentiation. Adapted from Ref. #15. See discussion section for details.



**Supplementary Table S1**

List of genes preferentially expressed either in WT Th1 cells ("Th1-selective") or in activated CD8<sup>+</sup> T cells ("activated CD8<sup>+</sup> T-selective"). Differential expression was defined as FC > 2; FDR ≤ 0.05 (Th1 and CD8<sup>+</sup> expression data were taken from Ref.#19).

| <b>"Th1-selective" gene set (169)</b> |           | <b>"activated CD8<sup>+</sup> T-selective" gene set (477)</b> |               |          |          |            |
|---------------------------------------|-----------|---------------------------------------------------------------|---------------|----------|----------|------------|
| 2210010N04Rik                         | Olfir672  | 1110031I02Rik                                                 | Cercam        | Gzmk     | Nt5dc2   | Sema7a     |
| 2610019F03Rik                         | Ormdl3    | 1500010J02Rik                                                 | Cfdp1         | H2-Ab1   | Nt5e     | Sep11      |
| 4933426M11Rik                         | P2rx7     | 2010002N04Rik                                                 | Chaf1b        | H2-Oa    | Nubpl    | Setd8      |
| 5830405N20Rik                         | Pde2a     | 2310016C08Rik                                                 | Chek1         | Haoa     | Nudt5    | Sfxn1      |
| A530021J07Rik                         | Pip5k1b   | 2310046K01Rik                                                 | Chst12        | Hat1     | Nudt9    | Sgol2      |
| A630052C17Rik                         | Ppp1r3f   | 2610028A01Rik                                                 | Cltb          | Havcr2   | Nuf2     | Shmt2      |
| Abtb1                                 | Pros1     | 2610318N02Rik                                                 | Clybl         | Hells    | Nup43    | Sigmar1    |
| Actn1                                 | Ptgir     | 2810417H13Rik                                                 | Cmtm7         | Hk2      | Nup93    | Slamf7     |
| Adam23                                | Rab37     | 2810452K22Rik                                                 | Cndp2         | Hmgcr    | Orc6l    | Slc16a1    |
| Adamtsl4                              | Rasa3     | 2900010J23Rik                                                 | Cnih4         | Hmgcs1   | Osbp13   | Slc19a1    |
| Adh1                                  | Rgs10     | 2900010M23Rik                                                 | Coro2a        | Hmmr     | P2rx3    | Slc1a4     |
| Aff3                                  | Rnf138    | 2900026A02Rik                                                 | Creg1         | Hook1    | Pa2g4    | Slc25a1    |
| AI747699                              | Rnf32     | 2900064A13Rik                                                 | Crybg3        | Hprt1    | Pafah1b3 | Slc25a17   |
| Aldh3b2                               | Rundc3a   | 3000004C01Rik                                                 | Csda          | Hpse     | Park7    | Slc3a2     |
| Amigo2                                | Rxra      | 4930572J05Rik                                                 | Cse11         | Hsd17b10 | Pdcd1    | Slc43a3    |
| Arhgap15                              | S1pr1     | 5730469M10Rik                                                 | Ctdspl2       | Hsd17b7  | Pdk3     | Slc7a1     |
| Arhgef18                              | Scml4     | Aaas                                                          | Cuedc2        | Hspa9    | Pfkip    | Slc7a3     |
| Art2b                                 | Sdcbp2    | Aacs                                                          | Cyb5r3        | Hspb6    | Phb      | Slc7a5     |
| Asap1                                 | Sell      | Aars                                                          | Cyp51         | Iars     | Phf10    | Smc2       |
| Atn1                                  | Sema3b    | Abcb1b                                                        | D5Wsu178e     | ldh1     | Phf16    | Smpd1      |
| Atp10d                                | Sesn3     | Abce1                                                         | D930014E17Rik | Ier3     | Pik3ap1  | Sms        |
| Axin2                                 | Sh3bp5    | Acaca                                                         | D930046H04Rik | Ifi30    | Pik3cg   | Smyd2      |
| B3galt2                               | Si        | Aco2                                                          | Dad1          | Ikzf2    | Pitrm1   | Snai3      |
| B630019A10Rik                         | Sidt1     | Acot11                                                        | Dars          | Il10     | Plcg2    | Soat2      |
| Bach2                                 | Slamf6    | Actl6a                                                        | Dbi           | Il12rb1  | Plek     | Spag5      |
| Bclp2                                 | Slc14a1   | Adam8                                                         | Dctd          | Ilf2     | Plekhf1  | Spats2     |
| Bmp7                                  | Slc25a45  | Adssl1                                                        | Ddx1          | Impa2    | Plk1     | Spes1      |
| Btbd11                                | Slc28a2   | Afg3l2                                                        | Dennd4a       | Ipo5     | Plod2    | Spire1     |
| Btla                                  | Slfn1     | AI847670                                                      | Dhcr24        | Irf4     | Pmvk     | Sqle       |
| Ccr7                                  | Slfn2     | Aim2                                                          | Dhfr          | Irf8     | Pnpt1    | Srm        |
| Cd200r1                               | Smad3     | Ak311                                                         | Dhrs11        | Isoc1    | Pola1    | St6galnac6 |
| Cd4                                   | Snx33     | Alad                                                          | Dis3          | Jup      | Pola2    | Stil       |
| Cd40lg                                | Sorcs2    | Aldh18a1                                                      | Dkk11         | Kenk5    | Pold2    | Stra13     |
| Cd5                                   | Spo11     | Aldh7a1                                                       | Dnm1          | Kif15    | Pole     | Sult2b1    |
| Cd84                                  | St3gal1   | Aldh9a1                                                       | Dnmt1         | Kif18a   | Pole2    | Supt3h     |
| Cd9                                   | St6gal1   | Aldoc                                                         | Dtl           | Kif20a   | Polr2d   | Suv39h1    |
| Cd97                                  | St8sia1   | Alg9                                                          | E2f1          | Klrc1    | Polr2e   | Syce2      |
| Chd3                                  | St8sia6   | Amica1                                                        | E2f8          | Klrd1    | Polr2f   | Tanc1      |
| Clec2d                                | Tas2r136  | Anln                                                          | Echdc1        | Klrk1    | Pop4     | Tbc1d7     |
| Crebl2                                | Tcf7      | Anxa4                                                         | Eea1          | Kpna3    | Pp11r    | Tcf19      |
| Crlf3                                 | Tcp1112   | Arhgap21                                                      | Eef2k         | Lag3     | Ppa1     | Tec        |
| Csf2                                  | Timp2     | Arhgdig                                                       | Ehd1          | Lamc1    | Ppap2c   | Tfblm      |
| Cyp4f16                               | Tlr1      | Asah1                                                         | Ehd4          | Lap3     | Ppil5    | Tfg        |
| Dgkd                                  | Tmem63a   | Asf1b                                                         | Eif4ebp1      | Larp1    | Ppp1r3b  | Tfrc       |
| Dst                                   | Tmem64    | Asns                                                          | Emilin2       | Lars     | Prcp     | Thoc3      |
| Ecm1                                  | Tmem71    | Atp5d                                                         | Emp3          | Lass6    | Prdx5    | Timm8b     |
| EG218444                              | Tmprss13  | Atpbd4                                                        | Eng           | Ldlr     | Prep     | Tipin      |
| EG240327                              | Tnfaip812 | Atpif1                                                        | Epcam         | Litaf    | Prfl     | Tk1        |
| Ehd3                                  | Tnfrsf25  | Aurka                                                         | Ergic1        | Lman1    | Prim1    | Tmem48     |
| ENSMUSG0000073540                     | Tnfrsf26  | Aurkb                                                         | Erlin1        | Lonp1    | Prim2    | Tmem97     |
| Fam134c                               | Tnfsf8    | B4galnt4                                                      | Ero11         | Lrp8     | Prkar2a  | Tmpo       |
| Fam169b                               | Trat1     | Bag2                                                          | Esm1          | Lrrk1    | Prr11    | Tnfrsf8    |
| Fam49a                                | Trib2     | Banf1                                                         | Etfb          | Lsm12    | Prr5     | Tnfrsf9    |
| Fam53b                                | Trim12    | Bard1                                                         | Exo1          | Lsm3     | Prrg4    | Tnfsf10    |
| Fcgr3                                 | Trim34    | BC024814                                                      | Exosc8        | Lsm4     | Psat1    | Topbp1     |
| Folr4                                 | Tspan32   | BC030867                                                      | Ezh2          | Lss      | Ptprj    | Tpx2       |
| Foxp3                                 | Ttc39b    | Bcat1                                                         | F630043A04Rik | Lzts1    | Ptprs    | Trim13     |
| Galnt10                               | Ttyh3     | Blm                                                           | Fads1         | Mad211   | Pus7     | Trim37     |

|          |         |
|----------|---------|
| Gata3    | Utrn    |
| Gbp2     | Vav3    |
| Gja1     | Vipr1   |
| Gjd3     | Yes1    |
| Gpm6b    | Ypel3   |
| Gpnmb    | Ypel4   |
| Gpr6     | Zbtb7b  |
| Gpr83    | Zfp281  |
| Gprc5b   | Zfp3611 |
| Gramd3   | Zhx2    |
| Hs3st3b1 |         |
| Ifi27    |         |
| Ifit2    |         |
| Igfbp4   |         |
| Inpp4b   |         |
| Itga2    |         |
| Itgb3    |         |
| Itih5    |         |
| Itm2a    |         |
| Jub      |         |
| Kat2b    |         |
| Kctd12   |         |
| Klf2     |         |
| Klf3     |         |
| Klk1b9   |         |
| Lgmn     |         |
| Ly6i     |         |
| Lysmd1   |         |
| Lyst     |         |
| Map3k5   |         |
| Mrfap1   |         |
| Ms4a4b   |         |
| Ms4a4c   |         |
| Ms4a6b   |         |
| Ms4a6c   |         |
| Nanos2   |         |
| Nipa1    |         |
| Nsg2     |         |
| Olf1036  |         |
| Olf1362  |         |
| Olf1396  |         |
| Olf1609  |         |

|               |        |         |          |         |
|---------------|--------|---------|----------|---------|
| Bnip3         | Fads2  | Mad212  | Pycr1    | Tspan31 |
| Bra1          | Fah    | Mapk6   | Qdpr     | Ttc35   |
| Bra2          | Fam54a | Mars    | Rab33a   | Ttc39c  |
| Bri3bp        | Fam73a | Mastl   | Rad51    | Tubb6   |
| Brip1         | Fam96a | Mbnl3   | Rad51ap1 | Tubg1   |
| Bsg           | Fanci  | Mcm10   | Rad54l   | Uhrf1   |
| Bst1          | Fasn   | Mcm2    | Rala     | Usp10   |
| Bub1          | Fbx15  | Mcm5    | Ran      | Usp11   |
| C1qbp         | Fchsd2 | Mcm6    | Rars     | Vat1    |
| C530044N13Rik | Fdft1  | Mcm7    | Rbbp7    | Vegfa   |
| Cables1       | Fh1    | Megf9   | Rbpj     | Vegfb   |
| Cad           | Figl1  | Mfsd2   | Rcn3     | Vps29   |
| Car12         | Fkbp3  | Mlk1    | Rdbp     | Wdhd1   |
| Cars          | Fndc3a | Morn2   | Rdh11    | Wdr67   |
| Casc4         | Foxm1  | Mrpl19  | Renbp    | Wee1    |
| Cbx5          | Frrs1  | Mrpl40  | Rfc1     | Yars    |
| Ccdc101       | Fzd7   | Mrrf    | Rfc3     | Zbtb32  |
| Ccl3          | G6pc3  | Msh2    | Rfc4     | Zdhhc8  |
| Ccl5          | Galc   | Mt1     | Rfc5     | Zwilch  |
| Ccna2         | Galnt3 | Mt2     | Rhbdf2   |         |
| Ccnb2         | Gatm   | Mthfd1  | Ripk3    |         |
| Cene2         | Gbe1   | Mthfd11 | Rmnd5b   |         |
| Cd160         | Gclm   | Mthfd2  | Rora     |         |
| Cd24a         | Gem    | Mvk     | Rpl23    |         |
| Cd38          | Gen1   | Mybl1   | Rqcd1    |         |
| Cd68          | Gins1  | Myo5a   | Rras     |         |
| Cd72          | Gins2  | Nampt   | Rrm1     |         |
| Cd79b         | Gm996  | Nars    | Rrp1b    |         |
| Cd80          | Gmds   | Ncaph   | Rted1    |         |
| Cd8a          | Gnb5   | Ndufs7  | Ruvbl2   |         |
| Cd8b1         | Gng12  | Ndufs8  | S100a1   |         |
| Cd93          | Gnptab | Ndufv1  | Sap30    |         |
| Cdc45l        | Gpd2   | Nedd4   | Sar1b    |         |
| Cdc6          | Gpr141 | Nek1    | Sass6    |         |
| Cdca7         | Gpr65  | Nkg7    | Sc4mol   |         |
| Cdca8         | Gpr68  | Nmt2    | Scarb1   |         |
| Cdh1          | Gpr89  | Nop16   | Sccpdh   |         |
| Cdk4          | Gpsn2  | Nr4a2   | Scd1     |         |
| Cdk6          | Gtse1  | Nrbp2   | Scd2     |         |
| Cdkn1a        | Gzma   | Nsdp1   | Sdf2l1   |         |
| Cenpn         | Gzmb   | Nsdhl   | Selenbp1 |         |
| Cenpv         | Gzmc   | Ns11    | Selenbp2 |         |

**Supplementary Table S2**

List of gene sets from the Molecular Signature Database that are up- (negative normalized enrichment score (NES)) or downregulated (positive NES) in activated HDAC1<sup>CKO</sup>/HDAC2<sup>HET</sup> CD4<sup>+</sup> T cells. Gene sets in red fonts have been generated from a comparison of published Th1 and activated CD8<sup>+</sup> T cell (CTL) microarray datasets (see methods section for details).

| <b>PATHWAY - UPREGULATED</b>                   | <b>NES</b>   |
|------------------------------------------------|--------------|
| <b>"ACTIVATED CD8<sup>+</sup> T-SELECTIVE"</b> | <b>-1,34</b> |
| APICAL JUNCTION                                | -1,28        |
| KRAS SIGNALING                                 | -1,19        |
| IL6-JAK-STAT3 SIGNALING                        | -1,15        |
| UV RESPONSE UP                                 | -1,14        |
| IL2-STAT5 SIGNALING                            | -1,07        |
| INTERFERON-GAMMA RESPONSE                      | -1,06        |
| INFLAMMATORY RESPONSE                          | -1,06        |
| EPITHELIAL MESENCHYMAL TRANSITION              | -1,05        |
| ADIPOGENESIS                                   | -1,03        |
| COMPLEMENT                                     | -1,02        |
| ALLOGRAFT REJECTION                            | -1,00        |
| KRAS SIGNALING UP                              | -0,97        |
| MYOGENESIS                                     | -0,92        |
| INTERFERON-ALPHA RESPONSE                      | -0,88        |
| HYPOXIA                                        | -0,86        |
| GLYCOLYSIS                                     | -0,82        |
| APOPTOSIS                                      | -0,80        |
| P53 PATHWAY                                    | -0,76        |
| XENOBIOTIC METABOLISM                          | -0,74        |

| <b>PATHWAY - DOWNREGULATED</b> | <b>NES</b>  |
|--------------------------------|-------------|
| <b>"Th1-SELECTIVE"</b>         | <b>1,44</b> |
| MITOTIC SPINDLE                | 1,06        |
| EARLY ESTROGEN RESPONSE        | 0,99        |
| TNFA SIGNALING VIA NFKB        | 0,97        |
| COAGULATION                    | 0,95        |
| LATE ESTROGEN RESPONSE         | 0,93        |
| HEME METABOLISM                | 0,71        |
| UV RESPONSE DOWN               | 0,66        |
